# Supplementary material for: Screening of Bacillus thuringiensis Isolates Recovered from Diverse Habitats in India for Crystal Toxin Genes Predicting Toxicity Against Three Insect Orders: Lepidoptera, Coleoptera, and Hemiptera
Source: Research Square preprint supplement (doi:10.21203/rs.3.rs-8459314/v1), 2026-01-14
Supplement: Supplementary file 1 [file 4af6ac4428c4f3fd3a4025b8.docx]

**Screening of *Bacillus thuringiensis* Isolates Recovered from Diverse Habitats in India for Crystal Toxin Genes Predicting Toxicity Against Three Insect Orders: Lepidoptera, Coleoptera, and Hemiptera**

**Subhash A1, Tharun Kumar C J1, Pallavi S2, Akshay Bharat Ghodake1, Sarvjeet Kaur1***

1. *ICAR-National Institute for Plant Biotechnology, PUSA Campus, New Delhi 110012, India*
2. *ICAR-Indian Institute of Horticultural Research, Hessaraghatta lake post, Bengaluru-560089, India*

**Corresponding author: ICAR-National Institute for Plant Biotechnology, Pusa Campus, New Delhi 110012, India, Telephone: 011-25848783; Fax: 011-25841787*

*Email:*[*dr_sarvjeetkaur@yahoo.com*](mailto:dr_sarvjeetkaur@yahoo.com)*,* [*Sarvjeet.Kaur@icar.gov.in*](mailto:Sarvjeet.Kaur@icar.gov.in)

*ORCID 0000-0002-0342-6627*

**Supplementary material:**

**Supplementary Table 1**: List of native *Bt* isolates recovered from different Agroclimatic Zones of India

| **S. No** | **Isolates** | **Source** | **Agroclimatic zones** |
| --- | --- | --- | --- |
|  | SK-1 | Chick Pea Field, Rohtak, Haryana | Trans Gangetic Plain |
|  | SK-5 | Cotton Field, Angroha, Hissar, Haryana | Trans Gangetic Plain |
|  | SK-9 | Chick Pea Field, Rohtak, Haryana | Trans Gangetic Plain |
|  | SK-28 | Cotton Field, Malout, Punjab | Trans Gangetic Plain |
|  | SK-63 | Orchard Soil, Shimla, Himachal Pradesh | Western Himalayan |
|  | SK-84 | Grain Dust, Bhareri, Shimla, Himachal Pradesh | Western Himalayan |
|  | SK-94 | Grain Dust, Bhareri, Shimla, Himachal Pradesh | Western Himalayan |
|  | Sk-110 | Chickpea Field, IARI, New Delhi | Trans Gangetic Plain |
|  | SK-208 | Phyllosphere, Pigeonpea Field, IARI, New Delhi | Trans Gangetic Plain |
|  | SK-213 | Phyllosphere, Chickpea Field, IARI, New Delhi | Trans Gangetic Plain |
|  | SK-214 | Phyllosphere, Chickpea Field, IARI, New Delhi | Trans Gangetic Plain |
|  | SK-219 | Phyllosphere, Chickpea Field, IARI, New Delhi | Trans Gangetic Plain |
|  | SK-220 | Phyllosphere, Chickpea Field, IARI, New Delhi | Trans Gangetic Plain |
|  | SK-223 | Phyllosphere, Garden Pea Field, IARI, New Delhi | Trans Gangetic Plain |
|  | SK-232 | Phyllosphere, Moong Bean Field, IARI, New Delhi | Trans Gangetic Plain |
|  | SK-303 | Field of Nematode Infestation, IARI, New Delhi | Trans Gangetic Plain |
|  | SK-307 | Field of Nematode Infestation, IARI, New Delhi | Trans Gangetic Plain |
|  | SK-409 | Chilli Field Black Soil, Vembur, Tuticorin, Tamil Nadu | East Coast Plains and Hills |
|  | SK-415 | Chilli Field Black Soil, Vembur, Tuticorin, Tamil Nadu | East Coast Plains and Hills |
|  | SK-505 | Chilli Field Black Soil, Vembur, Tuticorin, Tamil Nadu | East Coast Plains and Hills |
|  | SK-512 | Chilli Field Black Soil, Vembur, Tuticorin, Tamil Nadu | East Coast Plains and Hills |
|  | SK-617 | Cattle Shed, Vembur, Tuticorin, Tamil Nadu | East Coast Plains and Hills |
|  | SK-669 | Kitchen Garden (Veg) Soil, Allahabad, Uttar Pradesh | Upper Gangetic Plain |
|  | SK-671 | Kitchen Garden Soil, Allahabad, Uttar Pradesh | Upper Gangetic Plain |
|  | SK-684 | Soil Sample, Sangam River, Allahabad, Uttar Pradesh | Upper Gangetic Plain |
|  | SK-700 | Cotton Field Soil, Lam, Guntur, Andhra Pradesh | East Coast Plains and Hills |
|  | SK-704 | Red Gram Field, Reddypalem, Guntur, Andhra Pradesh | East Coast Plains and Hills |
|  | SK-710 | Red Gram Field, Reddypalem, Guntur, Andhra Pradesh | East Coast Plains and Hills |
|  | SK-711 | Red Gram Field, Lam, Guntur, Andhra Pradesh | East Coast Plains and Hills |
|  | SK-714 | Cotton Field, Black Soil, Goromtla, Andhra Pradesh | Southern Plateau and Hills |
|  | SK-722 | Soil from Cotton Field, Lam, Guntur, Andhra Pradesh | East Coast Plains and Hills |
|  | SK-727 | Cotton Seeds Var. LK-861, Lam, Guntur, Andhra Pradesh | East Coast Plains and Hills |
|  | SK-734 | Cold Storage Cotton Field, Guntur, Andhra Pradesh | East Coast Plains and Hills |
|  | SK-750 | Chickpea Seeds, Lam, Guntur, Andhra Pradesh | East Coast Plains and Hills |
|  | SK-754 | Chickpea Seeds, Lam, Guntur, Andhra Pradesh | East Coast Plains and Hills |
|  | SK-758 | Jowar Grain Dust, Guntur, Andhra Pradesh | East Coast Plains and Hills |
|  | SK-768 | Jowar Grain Dust, Guntur, Andhra Pradesh | East Coast Plains and Hills |
|  | SK-783 | Jowar Grain Dust, Guntur, Andhra Pradesh | East Coast Plains and Hills |
|  | SK-790 | Green Gram Seeds, Lam, Guntur, Andhra Pradesh | East Coast Plains and Hills |
|  | SK-793 | Chilli Seeds Warehouse, Nallapuda, Guntur, Andhra Pradesh | East Coast Plains and Hills |
|  | SK-795 | Chilli Seeds Warehouse, Nallapuda, Guntur, Andhra Pradesh | East Coast Plains and Hills |
|  | SK-797 | Stored Red Gram Seeds, Lam, Guntur, Andhra Pradesh | East Coast Plains and Hills |
|  | SK-798 | Stored Red Gram Seeds, Lam, Guntur, Andhra Pradesh | East Coast Plains and Hills |
|  | SK-807 | Black Gram Seeds, Guhtur, Andhra Pradesh | East Coast Plains and Hills |
|  | SK-853 | Wheat Field, Location 1, Burdwan, UttalRamhagar, West Bengal | Lower Gangetic Plains |
|  | SK-870 | Wheat Field, Location 2, Burdwan, UttalRamhagar, West Bengal | Lower Gangetic Plains |
|  | SK-922 | Desert Soil, Location 2, Khyaliwala, Sriganganagar, Rajasthan | Trans Gangetic Plain |
|  | SK-928 | Desert Soil, Location 2, Khyaliwala, Sriganganagar, Rajasthan | Trans Gangetic Plain |
|  | SK-931 | Desert Soil, Location 2, Khyaliwala, Sriganganagar, Rajasthan | Trans Gangetic Plain |
|  | SK-934 | Desert Soil, Location 2, Khyaliwala, Sriganganagar, Rajasthan | Trans Gangetic Plain |
|  | SK-935 | Desert Soil, Location 3, Khyaliwala, Sriganganagar, Rajasthan | Trans Gangetic Plain |
|  | SK-942 | Desert Soil, Location 3, Khyaliwala, Sriganganagar, Rajasthan | Trans Gangetic Plain |
|  | SK-949 | Cotton Field 1, Khyaliwala, Sriganganagar, Rajasthan | Trans Gangetic Plain |
|  | SK-955 | Cotton Field 1, Khyaliwala, Sriganganagar, Rajasthan | Trans Gangetic Plain |
|  | SK-958 | Desert Soil, Location 1, Khyaliwala, Sriganganagar, Rajasthan | Trans Gangetic Plain |
|  | SK-961 | Desert Soil, Location 1, Khyaliwala, Sriganganagar, Rajasthan | Trans Gangetic Plain |
|  | SK-976 | Cotton Field 2, Khyaliwala, Sriganganagar, Rajasthan | Trans Gangetic Plain |
|  | SK-977 | Cotton Field 2, Khyaliwala, Sriganganagar, Rajasthan | Trans Gangetic Plain |
|  | SK-979 | Cotton Field 3, Khyaliwala, Sriganganagar, Rajasthan | Trans Gangetic Plain |
|  | SK-984 | Cotton Field 3, Khyaliwala, Sriganganagar, Rajasthan | Trans Gangetic Plain |
|  | SK-995 | Cotton Field 4, Khyaliwala, Sriganganagar, Rajasthan | Trans Gangetic Plain |
|  | SK-996 | Grain Dust I, Khyaliwala Sriganganagar, Rajasthan | Trans Gangetic Plain |
|  | SK-1004 | Grain Dust I, Khyaliwala Sriganganagar, Rajasthan | Trans Gangetic Plain |
|  | SK-1014 | Cow Shed Sample, Sriganganagar, Rajasthan | Trans Gangetic Plain |
|  | SK-1036 | Soil Sample, Baramulla, J & K | Western Himalayan |
|  | SK-1051 | Maize Field, Motali, Udaipur, Rajasthan | Central Plateau and Hills |
|  | SK-1064 | Maize Field, Bankoda, Dungarpur, Rajasthan | Central Plateau and Hills |
|  | SK-1100 | Mustard Seeds, Location 1, Kalmanda, Baran, Rajasthan | Central Plateau and Hills |
|  | SK-1317 | Cotton Field, Location 2, Gujarat | Gujarat Plains and Hills |
|  | SK-1319 | Cotton Field, Location 2, Gujarat | Gujarat Plains and Hills |
|  | SK-1322 | Cotton Field, Location 2, Gujarat | Gujarat Plains and Hills |
|  | SK-1338 | Non-Cultivated Land, Bengaluru, Karnataka | Southern Plateau and Hills |
|  | SK-1343 | Forest Area, Location 1, Manipur | Eastern Himalayan |
|  | SK-1352 | Forest Area, Location 1, Manipur | Eastern Himalayan |
|  | SK-1356 | Forest Area, Location 1, Manipur | Eastern Himalayan |
|  | SK-1374 | Forest Area, Location 1, Manipur | Eastern Himalayan |
|  | SK-1376 | Forest Area, Location 1, Manipur | Eastern Himalayan |
|  | SK-1383 | Kitchen Area, Manipur | Eastern Himalayan |
|  | SK-1386 | Kitchen Area, Manipur | Eastern Himalayan |

**Supplementary Table 2**: List of *Bt* reference strains used in this study, acquired from BGSC, Ohio State University, USA

| **S. no** | ***Bt* Strains** | **Original code** | **Serovar** |
| --- | --- | --- | --- |
| **1.** | HD1 | HD1 | *B. thuringiensis* subsp. *kurstaki* |
| **2.** | 4F3 | HG293 | *B. thuringiensis* subsp. *kenyae* |
| **3.** | 4A6 | 1715 | *B. thuringiensis* subsp. *thuringiensis* |
| **4.** | 4H2 | HD224 | *B. thuringiensis* subsp. *canadensis* |
| **5.** | 4J3 | HD133 | *B. thuringiensis* subsp. *aizawai* |
| **6.** | 4J4 | HD11 | *B. thuringiensis* subsp. *aizawai* |
| **7.** | 4K1 | HD12 | *B. thuringiensis* subsp. *morrisoni* |
| **8.** | 4L3 | HD537 | *B. thuringiensis* subsp. *tolworthi* |
| **9.** | 4Q5 | 4Q2-72 | *B. thuringiensis* subsp. *israelensis* |
| **10.** | 4S2 | HD521 | *B. thuringiensis* subsp. *indiana* |
| **11.** | 4W1 | HD867 | *B. thuringiensis* subsp. *kumamtoensis* |
| **12.** | 4G6 | HD168 | *B. thuringiensis* subsp. *galleriae* |

**Supplementary Table 3**: Selected allelic variants of novel Insecticidal toxic genes that are reported in the Bacterial Pesticidal Protein Resource Centre (BPPRC)

| **Insect order** | **Toxins** | **Subclass** | **Number of genes reported** |
| --- | --- | --- | --- |
| **Lepidopteran** | Cry15 | *cry15Aa* | 1 |
| Cry30 | *cry30Fa*  *cry30Ga* | 2 |
| Cry54 | *cry54Aa* | 2 |
| Cry79 | *cry79Aa* | 1 |
| **Coleopteran** | Cry7 | - | 38 |
| Cry8 | - | 59 |
| Xpp37 | *xpp37Aa1* | 1 |
| Cry75 | *cry75Aa*  *cry75Ab* | 2 |
| **Hemipteran** | Cry64 | *cry64Aa*  *cry64Ba*  *cry64Ca* | 3 |
| Cry78 | *cry78Aa*  *cry78Ba*  *cry78Ab*  *cry78Bb*  *cry78Ca*  *cry78Da* | 6 |
